# Supplementary material
Source: publisher figshare collection journal article supplement (https://tandf.figshare.com/articles/dataset/_/3124324)
Supplement: Supplementary file 1 [file 1]

Archive with 2 entries (2 files):
- ujsp_a_1158675_sm4907.pdf
- ujsp_a_1158675_sm0790.pdf
