# Supplementary material
Source: publisher figshare collection journal article supplement (https://tandf.figshare.com/articles/dataset/_/3124324)
Supplement: Supplementary file 1 [file 1 › ujsp_a_1158675_sm4907.pdf]

## Supplement: An exemplary computation of the quantities

$$\tau_d^{(i)}, \xi_c, \text{ and } \alpha_c$$

Here, we consider the case where the distribution  $P$  is specified by: the random variable  $X$  is univariate and distributed according to some unknown distribution  $P_X$ , and the joint distribution of  $(Y, X)$  is given by the simple model  $Y = \beta_0 + \beta_1 X + \varepsilon$ , where  $\varepsilon \sim \mathcal{N}(0, \sigma^2)$  with  $\beta_0$  and  $\sigma^2$  unknown. The goal is to compute the quantities  $\tau_d^{(i)}, \xi_c$ , and  $\alpha_c$  analytically.

Since  $\beta_0 = \mathbb{E}(Y - \beta_1 X)$ , one has  $\hat{\beta}_0 = g^{-1} \sum_{i=1}^g (Y_i - \beta_1 X_i)$  and  $\Gamma$  takes the form

$$\begin{aligned} \Gamma(1, \dots, g; g+1) &= G((X_1, Y_1), \dots, (X_g, Y_g); (X_{g+1}, Y_{g+1})) \\ &= (g^{-1} \sum_{i=1}^g (Y_i - \beta_1 X_i) + \beta_1 X_{g+1} - Y_{g+1})^2, \end{aligned}$$

using the mean squared error as the loss function. By a slight abuse of notation, let us write  $Z_i := Y_i - \beta_1 X_i = \beta_0 + \varepsilon_i$ . (Correctly, one would have to use yet another notation, say  $W_i$  instead of  $Z_i$ ; however, one would then obtain

$$G(Z_1, \dots, Z_g; Z_{g+1}) = G(W_1, \dots, W_g; W_{g+1})$$

as equality of random variables on the entire probability space which is why we use the notation  $Z_i$  in the first place.) Then,  $Z_i$  is *i.i.d.* from  $Z \sim \mathcal{N}(\beta_0, \sigma^2)$  and  $\Gamma$  can be written in terms of these variables as

$$\Gamma(1, \dots, g; g+1) = G(Z_1, \dots, Z_g; Z_{g+1}) = (g^{-1} \sum_{i=1}^g Z_i - Z_{g+1})^2 = (g^{-1} \sum_{i=1}^g \varepsilon_i - \varepsilon_{g+1})^2.$$

Therefore,  $\Gamma$  is  $\sigma^2(1/g + 1)$  times a chi-square variable with one degree of freedom. Moreover,  $\Theta = \mathbb{E}\Gamma = \mathbb{V}(g^{-1} \sum_{i=1}^g \varepsilon_i - \varepsilon_{g+1}) = \sigma^2(1 + g^{-1})$ . This formula is similar to [Zhang and Qian \(2013, \(9\), \(10\)\)](#).

Recall that the covariance between two chi-square random variables can be computed as follows. Let  $(P, Q)$  be a bivariate normal distribution with covariance matrix  $\begin{pmatrix} a & b \\ b & c \end{pmatrix}$  and mean  $(0, 0)^T$ . Then,  $\text{Cov}(P^2, Q^2) = 2b^2$ . Hence, all  $\tau_d^{(i)}$  are non-negative in this case.

Some care has to be taken: the degree of  $\Theta$  is two rather than  $g + 1$ ; thus, Assumption 1 is not valid in this case. However, in this chapter we will only make use of the non-degeneracy of the associated  $U$ -statistic which is a slightly weaker statement than the assumption; non-degeneracy still remains valid. On a related note, let  $s^2$  denote the usual unbiased variance estimator for  $\sigma^2$ , which is a  $U$ -statistic of degree two. Then one can check that the symmetrized form  $\Gamma_0$  of  $\Gamma$  coincides with  $s^2(1 + g^{-1})$ , which also follows from the uniqueness of the  $U$ -statistic for a regular parameter.

Another possibility to resolve the issue would be to add a negligibly small term of degree  $g + 1$  to  $\Gamma$ ; in other words, the collection of choices of  $\Gamma$  such that the assumption is violated is a null set in some sense.

Let us abbreviate  $A = \sum_{i=1}^d \varepsilon_i$ ,  $C = \sum_{i=d+1}^g \varepsilon_i$ ,  $D = \sum_{i=g+2}^{2g-d+1} \varepsilon_i$ . Then,  $A \sim (d\sigma^2)^{1/2} \mathcal{N}(0, 1)$ ,  $C \sim ((g-d)\sigma^2)^{1/2} \mathcal{N}(0, 1)$ ,  $D \sim ((g-d)\sigma^2)^{1/2} \mathcal{N}(0, 1)$ . Furthermore,  $\mathbb{E}A^4 = 3(d\sigma^2)^2$  due to the normal kurtosis,  $\mathbb{E}A^3 = \mathbb{E}A = \mathbb{E}C = \mathbb{E}D = 0$ ,  $\mathbb{E}A^2 = d\sigma^2$ ,  $\mathbb{E}C^2 = \mathbb{E}D^2 = (g-d)\sigma^2$ .

Note that for type one, the overlap is only between the two learning sets, thus  $d = c$ , and we only use the letter  $d$ . Making use of the mutual independences between  $A, C, D, \varepsilon_{g+1}, \varepsilon_{2g+2-d}$ , we obtain:

$$\begin{aligned} \tau_c^{(1)} &= \text{Cov}((g^{-1}(A+C) - \varepsilon_{g+1})^2, (g^{-1}(A+D) - \varepsilon_{2g+2-c})^2) = \\ &= 2(\text{Cov}(g^{-1}(A+C) - \varepsilon_{g+1}, g^{-1}(A+D) - \varepsilon_{2g+2-c}))^2 = \\ &= c^2[2g^{-4}\sigma^4] \end{aligned}$$

This is remarkable because there seem to be few places in the literature where the quantities  $\sigma_d$  of a  $U$ -statistic are explicitly calculated. In particular, no variance formulae for the leave- $p$ -out error of linear regression are known, except in the “leave-one-out”-case.

For type two, we have  $d = c + 1$  and it is convenient to choose the following abbreviations:  $A = \sum_{i=1}^c \varepsilon_i$ ,  $C = \sum_{i=c+1}^g \varepsilon_i$ , and  $D = \sum_{i=g+2}^{2g-c} \varepsilon_i$ . Note that the symmetry between  $C$  and  $D$  is lost and we have  $\mathbb{E}C^2 = (g-c)\sigma^2$  and  $\mathbb{E}D^2 = (g-c-1)\sigma^2$ . We prefer to perform the index shift  $c + 1$  on the left hand-side of the equation in order to stress the analogy of the computation with type one above. We then have

$$\begin{aligned} \tau_{c+1}^{(2)} &= 2\text{Cov}[(g^{-1}(A+C) - \varepsilon_{g+1}), (g^{-1}(A + \varepsilon_{g+1} + D) - \varepsilon_{2g-c+1})]^2 \\ &= c^2[2g^{-4}\sigma^4] + c[-4g^{-3}\sigma^4] + 2g^{-2}\sigma^4. \end{aligned} \quad (1)$$

For type three, we have  $d = c + 2$  and it is convenient to choose the following abbreviations:  $A$  and  $D$  as above, but  $C = \sum_{i=c+2}^g \varepsilon_i$ . We then have

$$\begin{aligned} \tau_{c+2}^{(3)} &= 2\text{Cov}[(g^{-1}(A + \varepsilon_{c+1} + C) - \varepsilon_{g+1}), (g^{-1}(A + \varepsilon_{g+1} + D) - \varepsilon_{c+1})]^2 \\ &= c^2[2g^{-4}\sigma^4] + c[-8g^{-3}\sigma^4] + 8g^{-2}\sigma^4. \end{aligned} \quad (2)$$

For type four, we abbreviate  $A = \sum_{i=1}^c \varepsilon_i$ ,  $C = \sum_{i=c+1}^g \varepsilon_i$ , and  $D = \sum_{i=g+2}^{2g-c+1} \varepsilon_i$ . Using that  $\mathbb{E}\varepsilon_{g+1}^3 = 0$  because the third central moment of a normal random variate vanishes, we obtain:

$$\begin{aligned} \tau_{c+1}^{(4)} &= 2\text{Cov}[(g^{-1}(A+C) - \varepsilon_{g+1}), (g^{-1}(A+D) - \varepsilon_{g+1})]^2 \\ &= c^2[2g^{-4}\sigma^4] + c[4g^{-2}\sigma^4] + 2\sigma^4. \end{aligned}$$

By (3.5), the expressions for the quantities  $\tau$  as functions of  $c$  yield for  $\xi_c$ :

$$\xi_c = 2\sigma^4 \left[ c - 2g + n + \frac{c^2}{g^2} - \frac{2c}{g} + \frac{2c^2n}{g^3} - \frac{4cn}{g^2} + \frac{2n}{g} + \frac{c^2n^2}{g^4} \right].$$

By (3.12), we have

$$\begin{aligned}\alpha_0 &= 2\sigma^4[-2g + n + 2ng^{-1}] \\ \alpha_1 &= 2\sigma^4\left[-\frac{2}{g} - \frac{4n}{g^2} + \frac{1}{g^2} + \frac{2n}{g^3} + \frac{n^2}{g^4} + 1\right] \\ \alpha_2 &= 4\sigma^4[g^{-2} + 2ng^{-3} + n^2g^{-4}] \\ \alpha_\gamma &= 0, \quad \gamma \geq 3.\end{aligned}$$

## References

Zhang Q., Qian P.Z.G., 2013. Designs for crossvalidating approximation models.  
*Biometrika*, 100(4), 997–1004.
